# Supplementary material
Source: publisher figshare collection journal article supplement (https://acs.figshare.com/ndownloader/files/25069369)
Supplement: Supplementary file 1 [file 25069369]

## Supporting Information

# A Doubly Interpenetrated Metal-Organic Framework of pcu Topology for Selective Separation of Propylene from Propane

*Ting Liu,<sup>a,b</sup> Hui Cui,<sup>b</sup> Xin Zhang,<sup>b,\*</sup> Zhi-Yin Zhang,<sup>a</sup> Rui-Biao Lin,<sup>b</sup> Bin Liang,<sup>b</sup> Jian Zhang,<sup>c</sup>*

*Dan Li,<sup>a,\*</sup> and Banglin Chen,<sup>b,\*</sup>*

<sup>a</sup> College of Chemistry and Materials Science, and Guangdong Provincial Key Laboratory of Functional Supramolecular Coordination Materials and Applications, Jinan University, Guangzhou 510632, P. R. China.

<sup>b</sup> Department of Chemistry, University of Texas at San Antonio, One UTSA Circle, San Antonio, Texas 78249-0698, United States.

©The Molecular Foundry Lawrence Berkeley National Laboratory Berkeley, Berkeley, CA 94720, United States.

Xin Zhang (email: xin.zhang2@utsa.edu), Dan Li (email: danli@jnu.edu.cn), and Banglin Chen (email: banglin.chen@utsa.edu).

## SYNTHESIS OF LIGANDS

**Synthesis of 2,5-bis(4-pyridyl) thiazolo-[5,4-*d*] thiazole (Py<sub>2</sub>TTz).** A mixture of dithiooxamide (1 g, 8.3 mmol) and 4-pyridinecarboxaldehyde (2 mL, 22 mmol) were added into 50mL anhydrous DMF. The obtained reaction mixture was refluxed for 8h at 155 °C. After cooling overnight, a yellow crystalline product was obtained, which was filtered, washed with water, and dried in air (1.48 g, 60% yield). <sup>1</sup>H NMR (300 MHz, CDCl<sub>3</sub>) δ 8.79 (d, *J* = 6.0 Hz, 2H), 7.88 (d, *J* = 6.4 Hz, 4H).

**Synthesis of 2-chloro-1,4-benzenedicarboxylic acid (2-Cl-H<sub>2</sub>BDC).** A mixture of 3-chloro-4-methylbenzoic acid (1 g, 6.5 mmol) and potassium permanganate (3.16g, 19.8mmol) was dissolved in 30 mL aqueous potassium hydroxide solution (KOH, 5%). The resultant solution was refluxed overnight at 110 °C. After cooling to room temperature,

the black precipitate was removed through filtration. The obtained colorless filtrate was acidified with concentrated hydrochloric acid to pH 1 to get the white precipitate of 2-Cl-H<sub>2</sub>BDC, which was then collected by filtration, washed with water, and dried in air at 80 °C (0.71g, 54% yield).

## SUPPLEMENTAL TABLE AND FIGURES

**Table S1.** Crystallographic and Refinement Parameters for **1**

| <b>Crystal data</b>            | <b>1</b>                                                                                                     |
|--------------------------------|--------------------------------------------------------------------------------------------------------------|
| Molecular formula <sup>a</sup> | C <sub>30</sub> H <sub>13</sub> Cl <sub>2</sub> N <sub>4</sub> O <sub>8</sub> S <sub>2</sub> Zn <sub>2</sub> |

|                                                           |                                                               |
|-----------------------------------------------------------|---------------------------------------------------------------|
| Formula weight <sup>a</sup>                               | 823.20                                                        |
| Temperature/K                                             | 273.15                                                        |
| Crystal system                                            | Triclinic                                                     |
| Space group                                               | <i>P</i> -1                                                   |
| <i>a</i> /Å                                               | 10.8529(7)                                                    |
| <i>b</i> /Å                                               | 10.9058(6)                                                    |
| <i>c</i> /Å                                               | 19.7841(11)                                                   |
| <i>α</i> /°                                               | 91.038(2)                                                     |
| <i>β</i> /°                                               | 97.961(2)                                                     |
| <i>γ</i> /°                                               | 104.293(3)                                                    |
| Volume/Å <sup>3</sup>                                     | 2243.9(2)                                                     |
| Z                                                         | 2                                                             |
| $\rho_{\text{calc}}$ g/cm <sup>3</sup>                    | 1.218                                                         |
| Solvent-accessible void space <sup>b</sup> / %            | 34.9                                                          |
| Theoretical pore volume <sup>b</sup> / cm <sup>3</sup> /g | 0.287                                                         |
| $\mu$ /mm <sup>-1</sup>                                   | 1.322                                                         |
| F(000)                                                    | 822                                                           |
| Crystal size/mm <sup>3</sup>                              | 0.04 × 0.02 × 0.02                                            |
| Radiation                                                 | CuK $\alpha$ ( $\lambda$ = 1.54184)                           |
| 2 $\theta$ range for data collection/°                    | 3.958 to 65.896                                               |
| Index ranges                                              | -16 ≤ <i>h</i> ≤ 16, -16 ≤ <i>k</i> ≤ 16, -29 ≤ <i>l</i> ≤ 29 |
| Reflections collected                                     | 9976                                                          |
| Goodness-of-fit on F <sup>2</sup>                         | 0.738                                                         |
| Final R indexes [ <i>I</i> ≥ 2 $\sigma$ ( <i>I</i> )]     | $R_1 = 0.0632$ , $wR_2 = 0.1855^c$                            |
| CCDC no.                                                  | 2016038                                                       |

<sup>a</sup>Molecular formula and formula weight were calculated based on the crystal structure without guest molecules. <sup>b</sup>Calculation based on the crystal structure using PLATON software. <sup>c</sup> $R_1 = \Sigma(|F_0| - |F_C|) / \Sigma |F_0|$   $wR_2 = [\Sigma w(|F_0|^2 - |F_C|^2)^2 / \Sigma w(F_0^2)]^{1/2}$ .

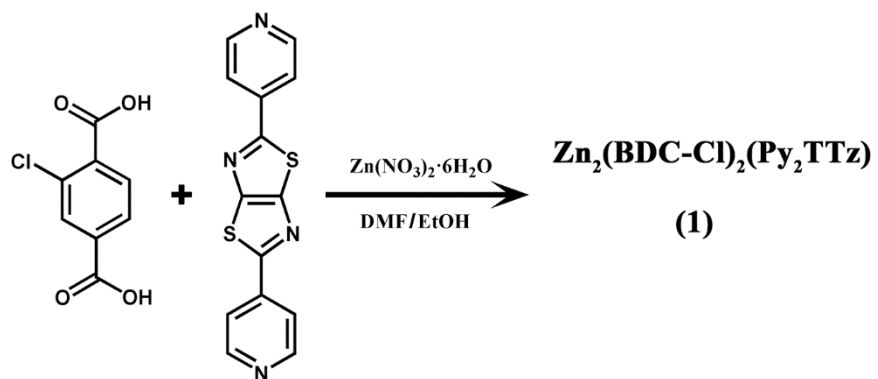

Figure S1. Schematic synthesis of 1.

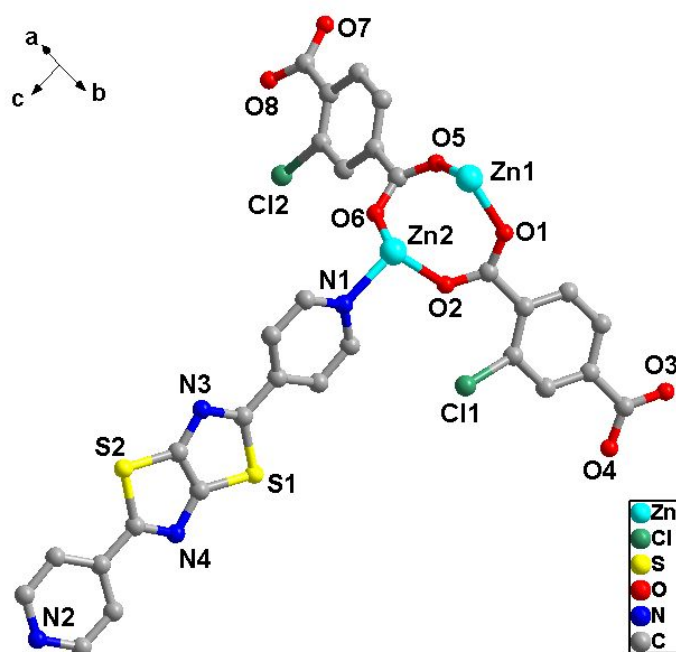

Figure S2. The asymmetric unit of 1.

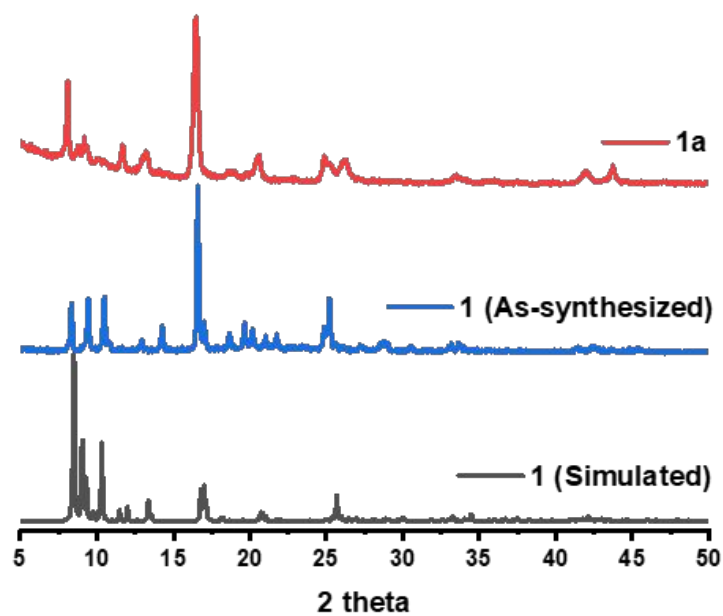

Figure S3. Powder x-ray diffraction of 1 and 1a.

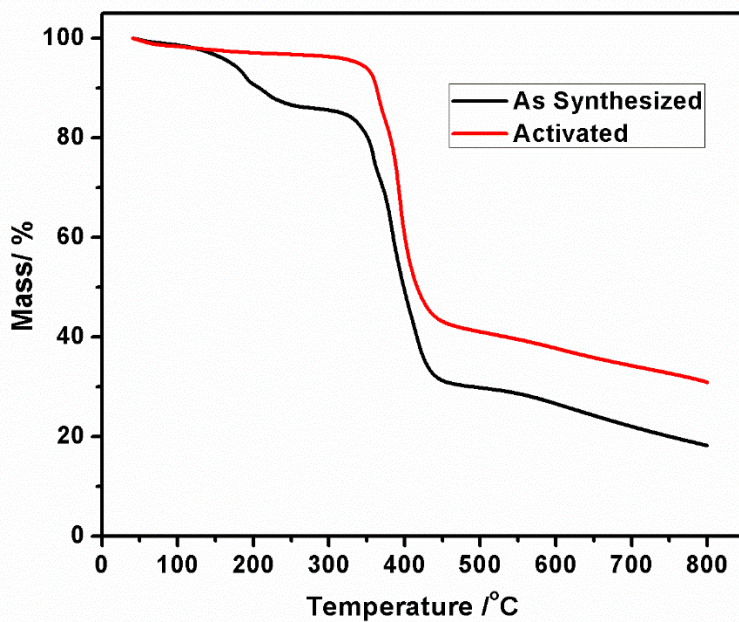

Figure S4. TGA of 1 and 1a.

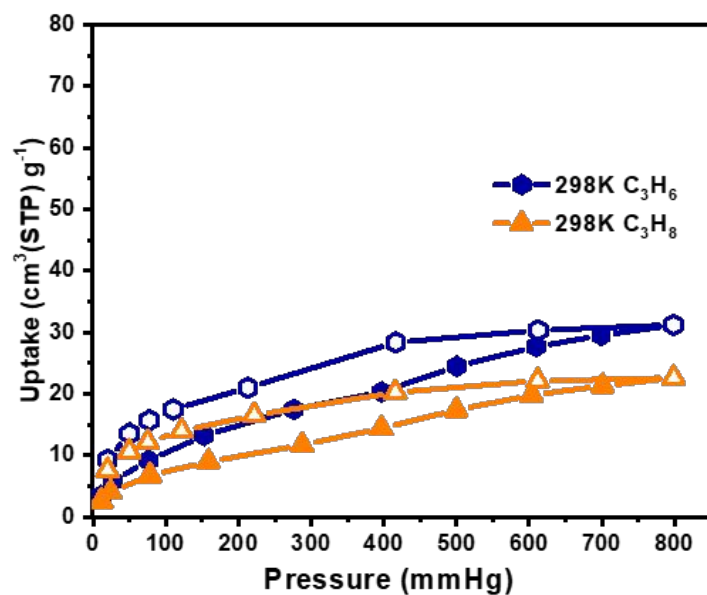

Figure S5.  $C_3H_6$  and  $C_3H_8$  adsorption isotherms of 1a at 298 K.

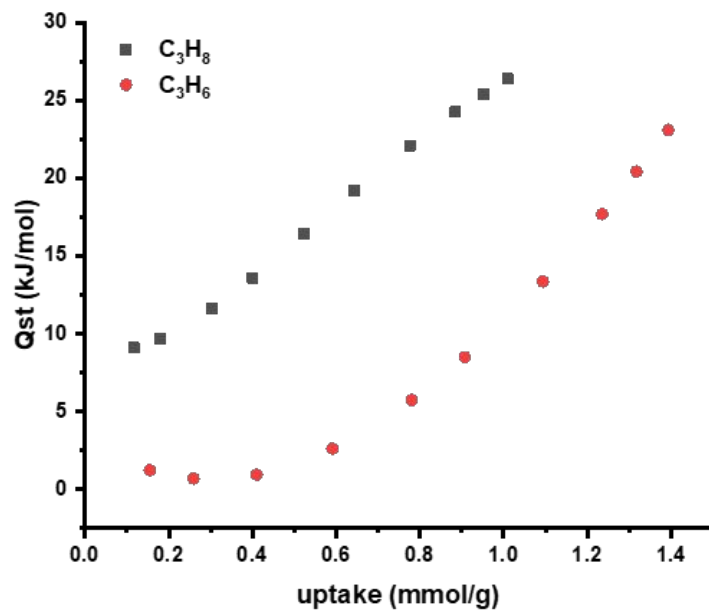

**Figure S6.** Heat of adsorption for  $C_3H_6$  and  $C_3H_8$ .
